# Supplementary material for: Additive Effects of Arsenic and Aristolochic Acid in Chemical Carcinogenesis of Upper Urinary Tract Urothelium
Source: Oxford University Press journal article supplement (doi:10.1158/1055-9965.epi-20-1090), 2020-12-04
Supplement: 10559965epi201090-sup-247626_3_supp_6722479_qkdqvv.docx [file 10559965epi201090-sup-247626_3_supp_6722479_qkdqvv.docx]

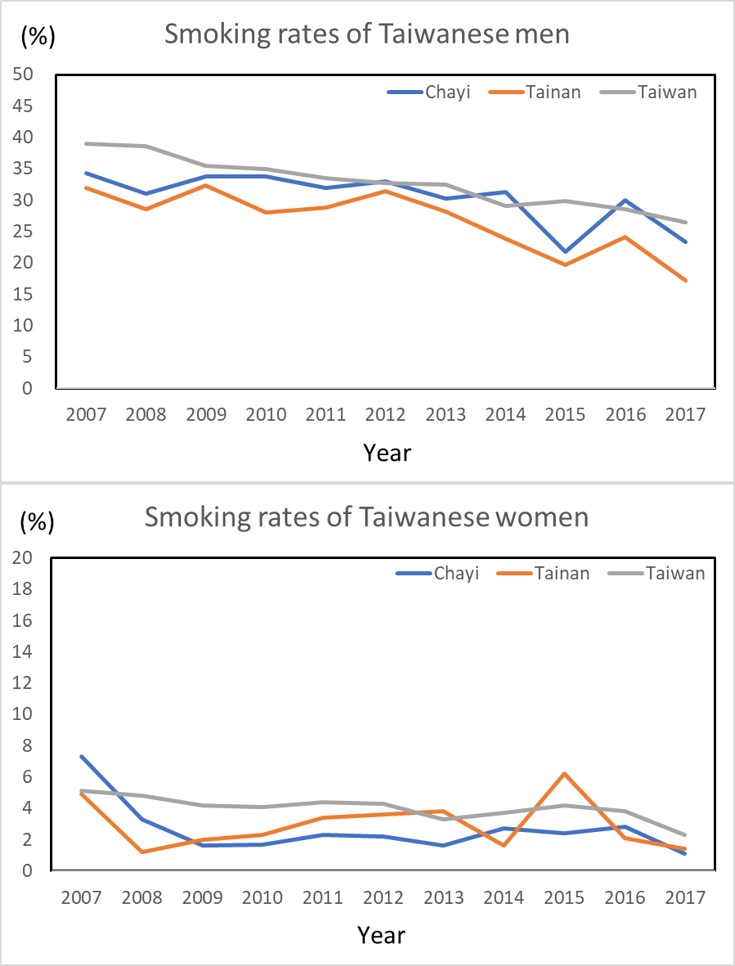


**Supplementary Figure 3.** Smoking rates in the Taiwanese population. Chiayi and Tainan are the two major counties with arseniasis-endemic areas. The information was obtained from published online data from the Health Promotion Administration, Ministry of Health and Welfare, Taiwan.
